# Supplementary material for: Reusable, few-layered-MoS2 nanosheets/graphene hybrid on cellulose paper for superior adsorption of methylene blue dye
Source: Royal Society of Chemistry journal article supplement (doi:10.1039/d0nj00246a), 2020-01-01
Supplement: d0nj00246a1.pdf [file d0nj00246a1.pdf]

## SUPPORTING INFORMATION

### Reusable, few-layered-MoS<sub>2</sub> nanosheets/graphene hybrid on cellulose paper for superior adsorption of methylene blue dye

Arthi Gopalakrishnan<sup>1</sup>, Satyam Pratap Singh<sup>2</sup>, Sushmee Badhulika<sup>1\*</sup>

<sup>1</sup> Department of Electrical Engineering, Indian Institute of Technology Hyderabad, Hyderabad 502285, India

<sup>2</sup> Department of Metallurgical and Materials Engineering, National Institute of Technology, Warangal, 506004, Telangana, India

\*Corresponding author: E-mail: [sbadh@iith.ac.in](mailto:sbadh@iith.ac.in); Phone: 040-23018443 Fax- 04023016032

<sup>1,2</sup> Equal Contribution

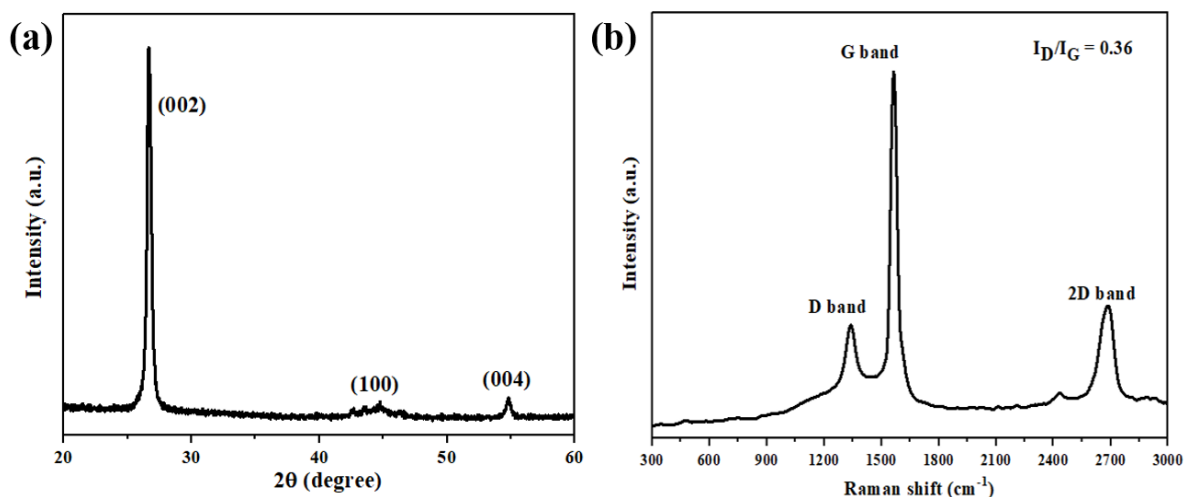

Figure S1: Graphene coated cellulose filter paper (G-CFP) (a) XRD pattern; (b) Raman spectrum

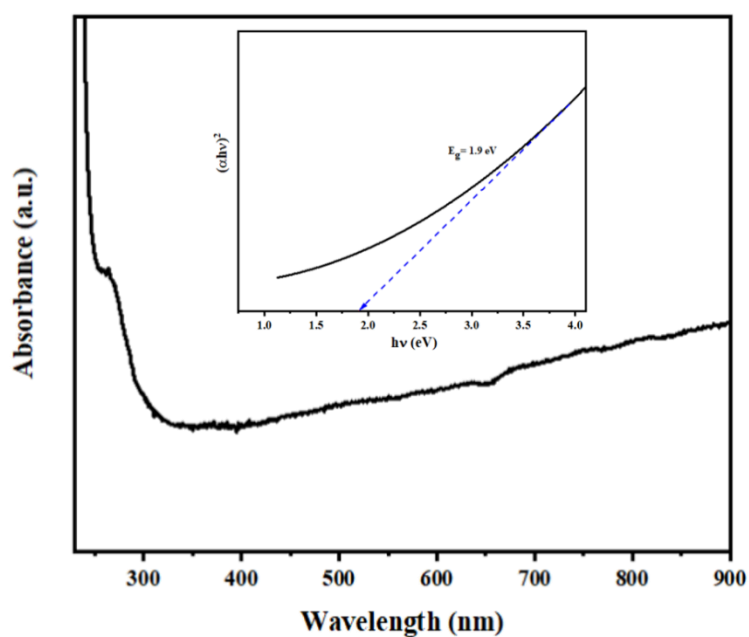

Fig. S2: UV-Vis spectroscopy of MoS<sub>2</sub>/Graphene coated cellulose filter paper (M-G-CFP).

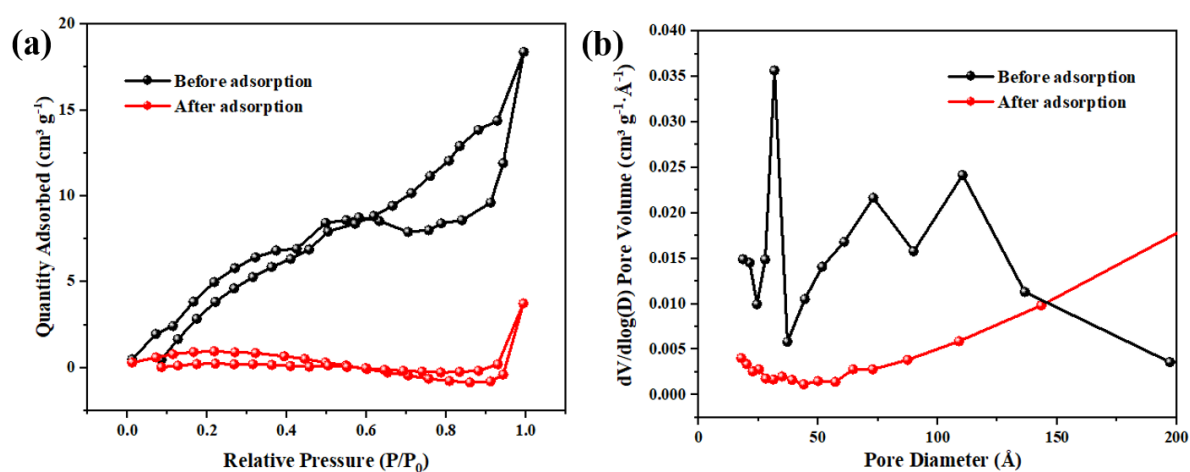

Fig. S3: (a) Nitrogen adsorption-desorption isotherm and (b) Pore size distribution curve of MoS<sub>2</sub>/Graphene coated cellulose filter paper (G-CFP) before and after MB adsorption (30mg dosage at pH 7, 298K, 100mg/L concentration)..

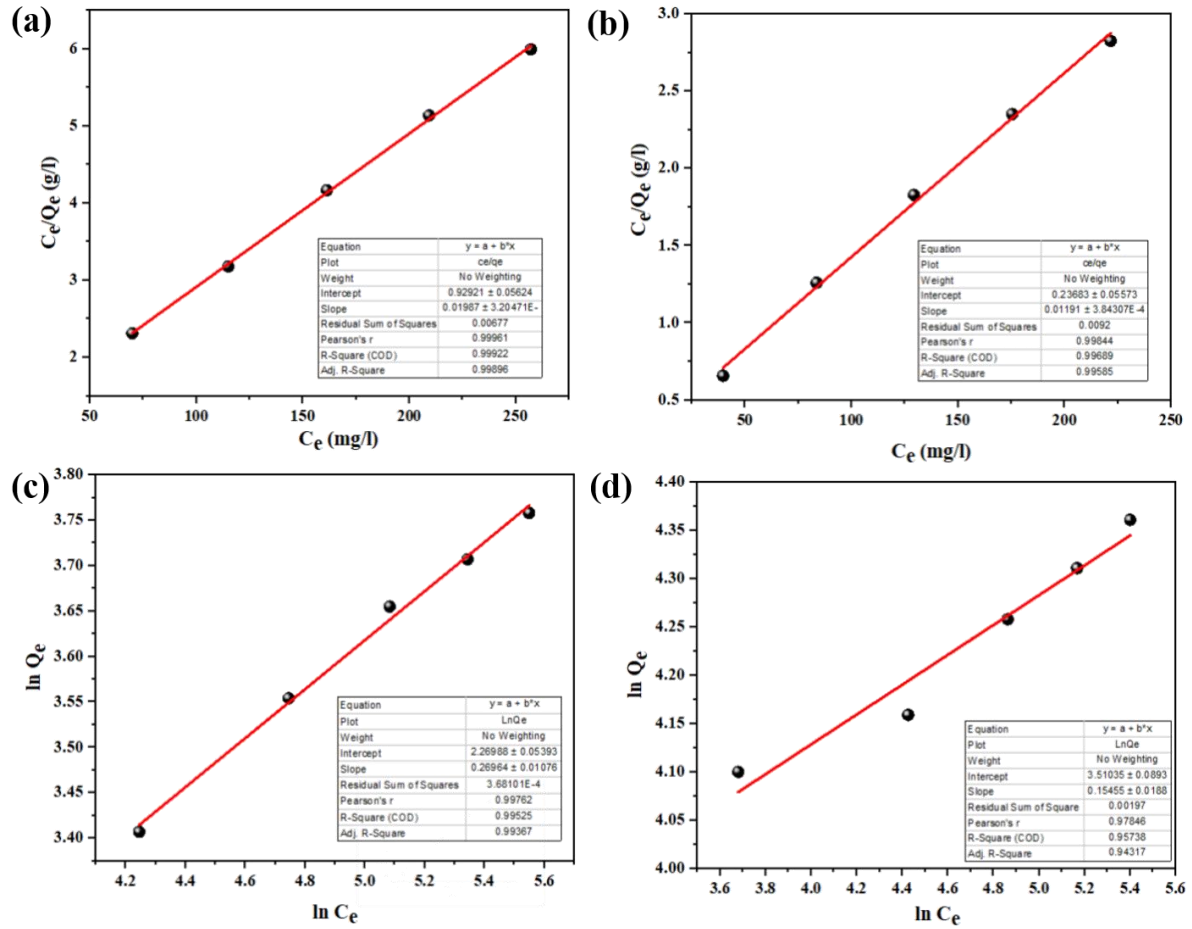

Fig. S4: (a) & (b)-Langmuir isotherm of CFP and G-CFP; (c) & (d)- Freundlich isotherm of CFP and G-CFP (30mg dosage at pH 7, 298K, 100-300mg/L).

Table S1: Adsorption isotherm parameters for MB adsorption on CFP and G-CFP of 30mg at 298K, pH 7.

| Isotherms         | Parameters                                                        | Cellulose filter paper | Graphene-coated cellulose filter paper |
|-------------------|-------------------------------------------------------------------|------------------------|----------------------------------------|
| Langmuir (Linear) | $Q_0$ (mg/g)                                                      | 50.32                  | 83.96                                  |
|                   | $b$ (L/mg)                                                        | 0.0213                 | 0.0502                                 |
|                   | $R_L$                                                             | 0.1348                 | 0.0625                                 |
|                   | $R^2$                                                             | 0.999                  | 0.996                                  |
|                   | $K_f$ (mg <sup>1-1/n</sup> · L <sup>1/n</sup> · g <sup>-1</sup> ) | 9.66                   | 33.44                                  |
|                   | $1/n$                                                             | 0.2696                 | 0.15455                                |

|                        |       |       |       |
|------------------------|-------|-------|-------|
| Freundlich<br>(Linear) | $R^2$ | 0.995 | 0.957 |
|------------------------|-------|-------|-------|
